# Supplementary material
Source: HighWire-hosted journal article supplement (https://rapm.bmj.com/content/45/1/44)
Supplement: inline-supplementary-material-1 [file inline-supplementary-material-1.pdf]

**Supplementary Table 1.** Demographics and baseline characteristics in subjects that completed the 12-month follow-up.

|                                                                        | <b>Overall<br/>(n=15)</b> | <b>Group 1<br/>(n=9)</b> | <b>Group 2<br/>(n=6)</b> |
|------------------------------------------------------------------------|---------------------------|--------------------------|--------------------------|
| <b>Age, Mean (SD), y</b>                                               | 51.9 (12.2)               | 52.3 (10.8)              | 51.4 (15.1)              |
| <b>Female, %</b>                                                       | 27                        | 22                       | 33                       |
| <b>Time since amputation, Mean (SD), y</b>                             | 7.8 (7.8)                 | 6.8 (5.3)                | 9.4 (11.0)               |
| <b>Time since onset of RLP, Mean (SD), y</b>                           | 7.8 (8.0)                 | 6.4 (5.4)                | 9.8 (10.8)               |
| <b>Time since onset of PLP, Mean (SD), y</b>                           | 8.0 (7.7)                 | 6.8 (5.3)                | 9.8 (10.8)               |
| <b>Level of Amputation</b>                                             |                           |                          |                          |
| Above knee, n (%)                                                      | 9 (60)                    | 8 (89)                   | 1 (17)                   |
| Below knee, n (%)                                                      | 6 (40)                    | 1 (11)                   | 5 (83)                   |
| <b>Treatment History<br/>(% Currently in use, % Previously in use)</b> |                           |                          |                          |
| Opioid medication                                                      | 40, 53                    | 22, 78                   | 17, 67                   |
| Non-opioid medications                                                 | 67, 13                    | 67, 11                   | 67, 17                   |
| Surface stimulation                                                    | 0, 27                     | 0, 22                    | 0, 33                    |
| Spinal cord stimulation                                                | 0, 0                      | 0, 0                     | 0, 0                     |
| Physical therapy                                                       | 7, 80                     | 11, 67                   | 0, 100                   |
| Acupuncture                                                            | 0, 7                      | 0, 11                    | 0, 0                     |
| Steroid injection                                                      | 0, 13                     | 0, 11                    | 0, 17                    |
| Botulinum toxin injection                                              | 0, 0                      | 0, 0                     | 0, 0                     |
| Nerve block                                                            | 0, 27                     | 0, 0                     | 0, 67                    |
| Other                                                                  | 0, 0                      | 0, 0                     | 0, 0                     |
